# Supplementary material
Source: bioRxiv or medRxiv preprint supplement (https://www.biorxiv.org/highwire/filestream/122228/field_highwire_adjunct_files/1/404616-2.pdf)

Figure S2.

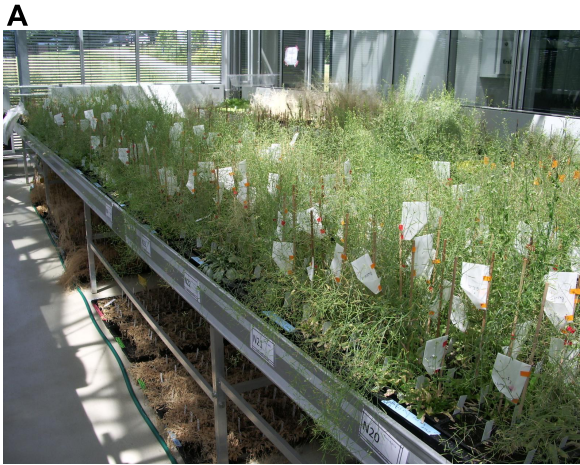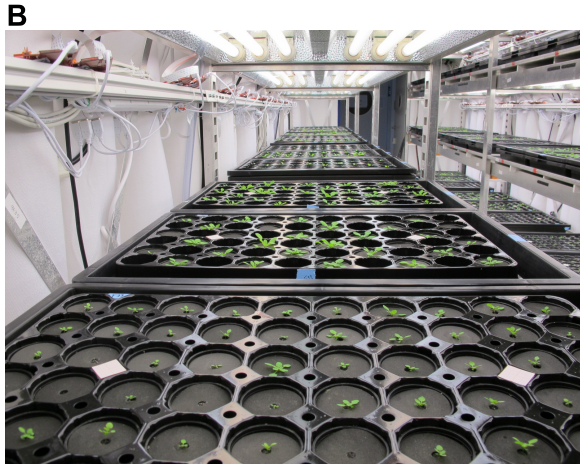

Supplement: Supplementary file [file 404616-2.pdf]
